# Supplementary material for: High Occurrence of Zoonotic Subtypes of <em>Cryptosporidium parvum</em> in Cypriot Dairy Farms
Source: Preprints.org preprint supplement (doi:10.20944/preprints202201.0384.v1), 2022-01-25
Supplement: Supplementary file 3 [file supplementary]

**Figure S1. Meteorological report on Nicosia and Larnaca, indicating average temperature and rainfall in these regions during the sampling period.**

**Stool samples were collected on 7/11/19, 8/11/19 and 14/11/19.**
